# Supplementary material for: Increased expression of long-noncoding RNA ZFAS1 is associated with epithelial-mesenchymal transition of gastric cancer
Source: publisher site journal article supplement (doi:10.18632/aging.101048), 2016-09-18
Supplement: Supplementary file 1 [file aging-v8i9-101048-supplementary-material-SD1.pdf]

**SUPPLEMENTARY MATERIAL**

**Table S1. List of primers used in this paper.**

| <b>Primer name</b> | <b>Sequence (5'-3')</b>   |
|--------------------|---------------------------|
| ZFAS1-F            | ACGTGCAGACATCTACAACCT     |
| ZFAS1-R            | TACTTCCAACACCCGCAT        |
| PVT1-F             | GGGAATAACGCTGGTGGAA       |
| PVT1-R             | CCCATGGACATCCAAGCTGT      |
| PRNCR1-F           | CAGCAGCCGATATGATGGTATT    |
| PRNCR1-R           | GGTTCTGTTGTCTGGTGATGG     |
| lncATB-F           | TCTGGCTGAGGCTGGTTGAC      |
| lncATB-R           | ATCTCTGGGTGCTGGTGAAGG     |
| HOTAIR-F           | CAGTGGGGAACCTCTGACTCG     |
| HOTAIR-R           | GTGCCTGGTGCTCTCTTACC      |
| MALAT-F            | AAAGCAAGGTCTCCCCACAAG     |
| MALAT-R            | GGTCTGTGCTAGATCAAAAAGGCA  |
| NKILA-F            | AACCAAACCTACCCACAACG      |
| NKILA-R            | ACCACTAAGTCAATCCCAGGTG    |
| H19-F              | GGGTCTGTTTCTTTACTTCCTCCAC |
| H19-R              | GATGTTGGGCTGATGAGGTCTGG   |
| TUG1-F             | ACAACGACTGAGCAAGCACTA     |
| TUG1-R             | GGAGGCACAGGACATAATTCACT   |
| GAPDH-F            | GGTCTCCTCTGACTTCAACA      |
| GAPDH-R            | GTGAGGGTCTCTCTCTTCT       |
| lncMVIH-F          | AATTTTGCACATCTGAACAGCC    |
| lncMVIH-R          | TTCAAAATCCCACTACGCCCA     |
| HULC-F             | CAGGAACTCTGATCGTGGACATT   |
| HULC-R             | CTTGCTTGATGCTTGGTCTGTTT   |

|            |                          |
|------------|--------------------------|
| HEIH-F     | TGGTGGCTTAGGCTTAATCTCAG  |
| HEIH-R     | GGTCTCAGTCAGTCATCATTCTCA |
| UFC1-F     | GCTACCCTCTCCCAGTCCTTA    |
| UFC1-R     | CTGACCTCCAACCTCCAACGAA   |
| UCA1-F     | CTCGGCTTAGTGGCTGAAGAC    |
| UCA1-R     | TGGTCCATTGAGGCTGTAGAGT   |
| MMP14-F    | TGCCTGCGTCCATCAACA       |
| MMP14-R    | CCCAATGCTTGTCTCCTTTGAAG  |
| ZEB1-F     | CAGCCAAATGGAAATCAGGATGAA |
| ZEB1-R     | GGCGGTGTAGAATCAGAGTCA    |
| Twist-F    | GTCCGCAGTCTTACGAGGAG     |
| Twist-R    | TGGAGGACCTGGTAGAGGAA     |
| CDH1-F     | AGACCAAGTGACCACCTTAGAG   |
| CDH1-R     | GAGCAGCAGAATCAGAATTAGCA  |
| CDH2-F     | CATCATCATCCTGCTTATCCTTGT |
| CDH2-R     | TTCTCCTCCACCTTCTTCATCAT  |
| Snail-F    | GCCTAGCGAGTGGTTCTTCT     |
| Snail-R    | TGCTGGAAGGTAAACTCTGGATT  |
| Vimentin-F | GATTTCTCTGCCTCTTCCAAACTT |
| Vimentin-R | TTCGTTGATAACCTGTCCATCTCT |
| EpCAM-F    | GTGGTTGTGGTGATAGCAGTTG   |
| EpCAM-R    | CCATCTCCTTTATCTCAGCCTTCT |

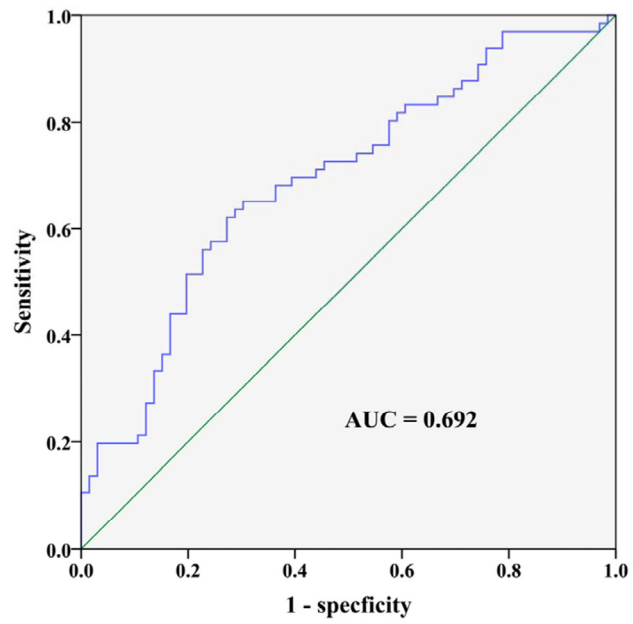

**Figure S1.** FROC curve for tissue. The ROC curve analysis for the diagnostic value of lncRNA ZFAS1 in tissue of GC (AUC =0.692, sensitivity: 0.653, specificity: 0.696).
